# Supplementary material for: Study of pro-angiogenic activity of astilbin on human umbilical vein endothelial cells in vitro and zebrafish in vivo
Source: Royal Society of Chemistry journal article supplement (doi:10.1039/c9ra01673b), 2019-01-01
Supplement: c9ra01673b1.pdf [file c9ra01673b1.pdf]

**Supplementary data**

**Study of pro-angiogenic activity of astilbin on human umbilical vein  
endothelial cells *in vitro* and zebrafish *in vivo***

Kongpeng Lv,<sup>a,b</sup> Qin Ren,<sup>a</sup> Xingyan Zhang,<sup>a</sup> Keda Zhang,<sup>a,b</sup> Jia Fei,<sup>b\*</sup> Tiyan Li,<sup>a\*</sup>

<sup>a</sup> Shenzhen Infectious Disease Medicine Engineering Center, Shenzhen People's Hospital, 2nd Clinical Medical College of Jinan University, Shenzhen 518120, Guangdong Province, China.

<sup>b</sup> Integrated Chinese and Western Medicine Postdoctoral Research Station, Jinan University, Guangzhou 510632, Guangdong Province, China

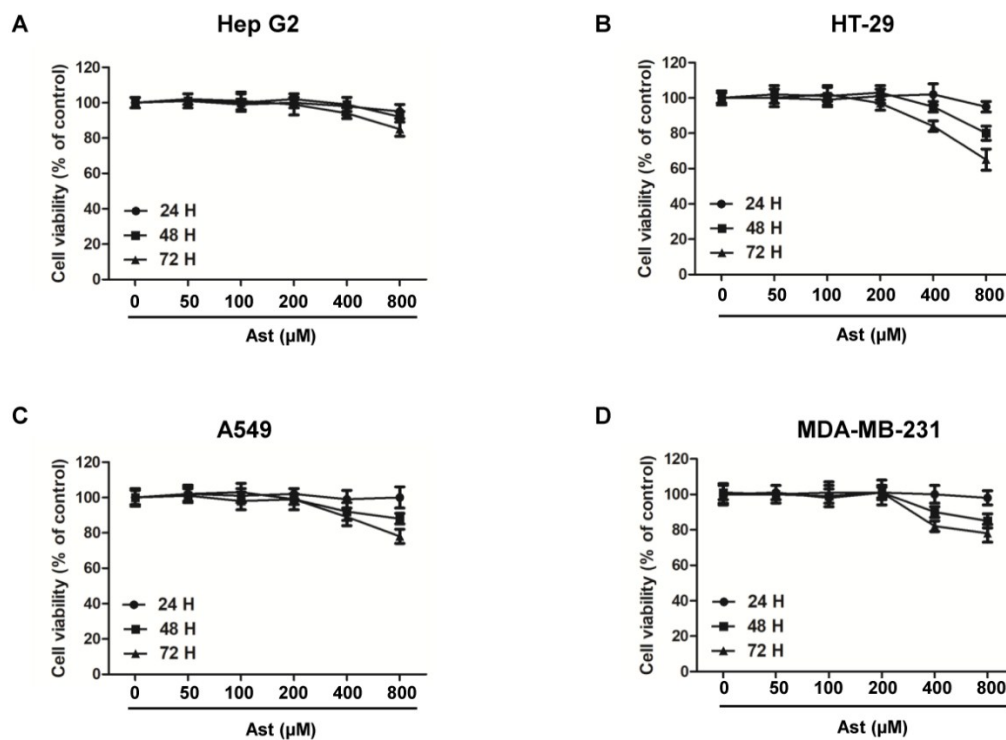

**Figure S1. Effects of astilbin on cell viability of different human cancer cells.** (A) Hep G2, (B) HT-29, (C) A549 and (D) MDA-MB-231 human cancer cells were treated with various concentrations of Ast (50-800 μM) in low serum media (0.5% FBS) culture for 24 h to 72 h. Then cell viability was detected by MTT assay. Data are presented as the percentage of the control group (mean ± SD of three independent experiments).

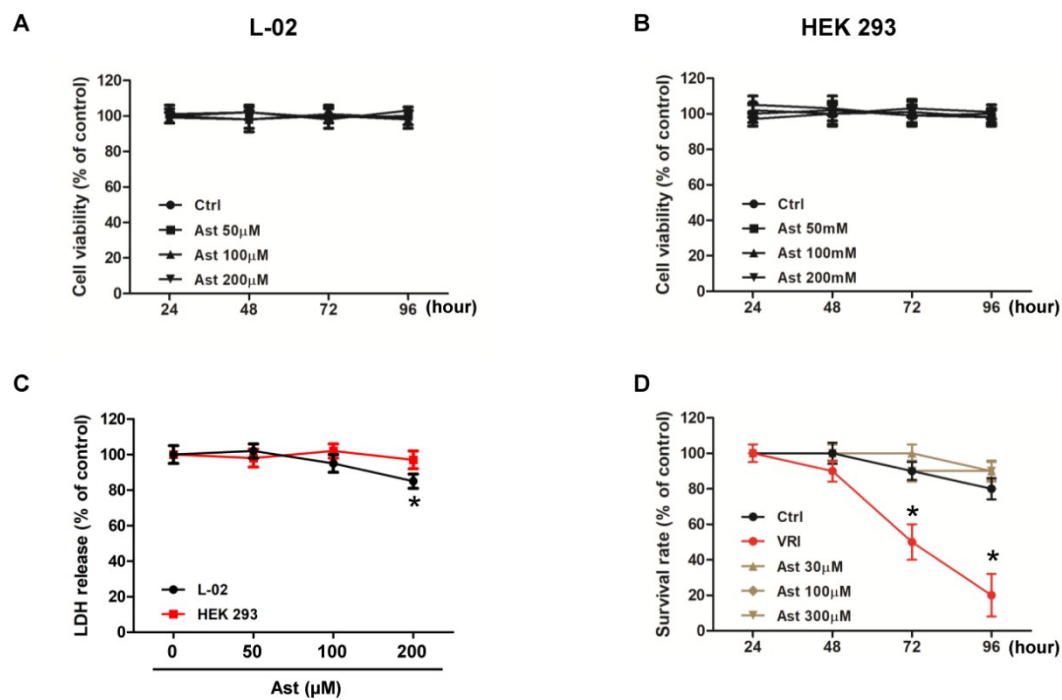

**Figure S2. Toxicity assessment of astilbin in normal human cell line and zebrafish larvae.** (A) L-02, human fetal hepatocytes and (B) HEK 293, human embryonic kidney cells were treated with various concentrations of Ast (50-200  $\mu$ M) in the media contained 10% FBS and then cultured for 24 h to 96 h. Then cell viability was detected by MTT assay. (C) LDH assay were performed after 96 h treatment in both L-02 and HEK 293 cells. (D) 24 hour post fertilization zebrafish embryos (n=15) were treated with various concentrations of Ast (30-300  $\mu$ M) for 96 h. The survival rate in each group were recorded every 24 h. Data are presented as the percentage of the control group (mean  $\pm$  SD of three independent experiments). \*p<0.05 versus control group.
